# Supplementary material
Source: PubMed Central journal article supplement (PMC7608915)
Supplement: ee9-2-e017-s001.pdf [file ee9-2-e017-s001.pdf]

| <b>Supplementary Table 1. Impact of LUR NO<sub>x</sub> (per IQR) on Uterine Artery Resistance</b> |        |             |                      |             |                      |             |                      |            |            |            |
|---------------------------------------------------------------------------------------------------|--------|-------------|----------------------|-------------|----------------------|-------------|----------------------|------------|------------|------------|
|                                                                                                   |        | Visit 1     |                      | Visit 2     |                      | Visit 3     |                      |            |            |            |
|                                                                                                   |        | n: ≥/ <90th | Model 1 <sup>a</sup> | n: ≥/ <90th | Model 1 <sup>a</sup> | n: ≥/ <90th | Model 1 <sup>a</sup> |            |            |            |
| <b>Pulsatility index</b>                                                                          |        |             |                      |             |                      |             |                      |            |            |            |
| Per SD (Beta, 95%CI)                                                                              |        |             | 0.01 -0.10, 0.12     |             | 0.07 -0.04, 0.18     |             | 0.11                 | 0.00, 0.23 |            |            |
| ≥ vs. <90 <sup>th</sup> percentile (Odds ratio, 95% CI)                                           | 56/502 | 1.01        | 0.69, 1.49           | 53/486      | 1.04                 | 0.71, 1.53  | 49/437               | 1.53       | 1.03, 2.28 |            |
| <b>Resistance index</b>                                                                           |        |             |                      |             |                      |             |                      |            |            |            |
| Per SD (Beta, 95%CI)                                                                              |        |             | 0.01 -0.10, 0.12     |             | 0.07 -0.04, 0.18     |             | 0.12                 | 0.01, 0.24 |            |            |
| ≥ vs. <90 <sup>th</sup> percentile (Odds ratio, 95% CI)                                           | 56/502 | 1.00        | 0.68, 1.46           | 54/485      | 0.94                 | 0.64, 1.39  | 48/438               | 1.47       | 0.99, 2.18 |            |
| <b>S/D ratio</b>                                                                                  |        |             |                      |             |                      |             |                      |            |            |            |
| Per SD (Beta, 95%CI)                                                                              |        |             | -0.02 -0.13, 0.09    |             | 0.06 -0.05, 0.17     |             | 0.12                 | 0.01, 0.23 |            |            |
| ≥ vs. <90 <sup>th</sup> percentile (Odds ratio, 95% CI)                                           | 55/503 | 1.11        | 0.76, 1.62           | 54/485      | 1.07                 | 0.73, 1.56  | 48/438               | 1.66       | 1.12, 2.44 |            |
| <b>Presence of notching</b>                                                                       |        |             |                      |             |                      |             |                      |            |            |            |
| Unilateral (Odds ratio, 95% CI)                                                                   |        | 133/420     | 1.21                 | 0.94, 1.55  | 124/412              | 1.17        | 0.92, 1.51           | 117/368    | 1.10       | 0.85, 1.43 |
| Bilateral (Odds ratio, 95% CI)                                                                    |        | 230/323     | 0.98                 | 0.76, 1.27  | 128/408              | 0.96        | 0.72, 1.28           | 116/369    | 1.12       | 0.83, 1.51 |

a. Models adjusted for maternal age, pre-pregnancy BMI, infant sex, parity, marital status, payment for prenatal care, maternal smoking, maternal race, maternal education

| <b>Supplementary Table 2. Impact of LUR NO<sub>2</sub> (per IQR) on Uterine Resistance by Smoking Status</b> |                            |                      |             |                            |                      |             |                            |                      |             |
|--------------------------------------------------------------------------------------------------------------|----------------------------|----------------------|-------------|----------------------------|----------------------|-------------|----------------------------|----------------------|-------------|
| <b>Among Never Smokers</b>                                                                                   |                            |                      |             |                            |                      |             |                            |                      |             |
|                                                                                                              |                            | Visit 1              |             |                            | Visit 2              |             |                            | Visit 3              |             |
|                                                                                                              | n: ≥/<br><90 <sup>th</sup> | Model 1 <sup>a</sup> |             | n: ≥/<br><90 <sup>th</sup> | Model 1 <sup>a</sup> |             | n: ≥/<br><90 <sup>th</sup> | Model 1 <sup>a</sup> |             |
| <b>Pulsatility index</b>                                                                                     |                            |                      |             |                            |                      |             |                            |                      |             |
| Per SD (Beta, 95% CI)                                                                                        |                            | 0.06                 | -0.06, 0.17 |                            | 0.10                 | -0.01, 0.22 |                            | 0.17                 | 0.05, 0.29  |
| ≥ vs. <90 <sup>th</sup> percentile (Odds ratio, 95% CI)                                                      | 35/323                     | 1.39                 | 0.91, 2.12  | 25/318                     | 1.16                 | 0.74, 1.84  | 30/286                     | 1.71                 | 1.06, 2.76  |
| <b>Resistance index</b>                                                                                      |                            |                      |             |                            |                      |             |                            |                      |             |
| Per SD (Beta, 95% CI)                                                                                        |                            | 0.06                 | -0.06, 0.18 |                            | 0.11                 | -0.01, 0.22 |                            | 0.18                 | 0.06, 0.31  |
| ≥ vs. <90 <sup>th</sup> percentile (Odds ratio, 95% CI)                                                      | 36/322                     | 1.39                 | 0.91, 2.12  | 24/319                     | 1.05                 | 0.66, 1.66  | 28/287                     | 1.68                 | 1.03, 2.72  |
| <b>S/D ratio</b>                                                                                             |                            |                      |             |                            |                      |             |                            |                      |             |
| Per SD (Beta, 95% CI)                                                                                        |                            | 0.02                 | -0.09, 0.13 |                            | 0.09                 | -0.02, 0.20 |                            | 0.15                 | 0.03, 0.27  |
| ≥ vs. <90 <sup>th</sup> percentile (Odds ratio, 95% CI)                                                      | 32/326                     | 1.39                 | 0.91, 2.13  | 29/314                     | 1.18                 | 1.13, 2.86  | 28/287                     | 1.80                 | 1.13, 2.86  |
| <b>Presence of notching</b>                                                                                  |                            |                      |             |                            |                      |             |                            |                      |             |
| Unilateral (Odds ratio, 95% CI)                                                                              | 89/266                     | 1.06                 | 0.79, 1.42  | 89/252                     | 0.95                 | 0.72, 1.26  | 80/236                     | 1.13                 | 0.83, 1.53  |
| Bilateral (Odds ratio, 95% CI)                                                                               | 141/214                    | 1.07                 | 0.79, 1.44  | 69/272                     | 1.12                 | 0.80, 1.59  | 77/239                     | 1.02                 | 0.72, 1.46  |
| <b>Among Former Smokers</b>                                                                                  |                            |                      |             |                            |                      |             |                            |                      |             |
| <b>Pulsatility index</b>                                                                                     |                            |                      |             |                            |                      |             |                            |                      |             |
| Per SD (Beta, 95% CI)                                                                                        |                            | -0.03                | -0.31, 0.26 |                            | 0.07                 | -0.21, 0.36 |                            | 0.13                 | -0.16, 0.41 |
| ≥ vs. <90 <sup>th</sup> percentile (Odds ratio, 95% CI)                                                      | 12/87                      | 0.85                 | 0.31, 2.37  | 11/83                      | 1.31                 | 0.45, 3.81  | 11/79                      | 2.38                 | 0.77, 7.38  |
| <b>Resistance index</b>                                                                                      |                            |                      |             |                            |                      |             |                            |                      |             |
| Per SD (Beta, 95% CI)                                                                                        |                            | -0.03                | -0.31, 0.25 |                            | 0.08                 | -0.21, 0.36 |                            | 0.13                 | -0.16, 0.41 |
| ≥ vs. <90 <sup>th</sup> percentile (Odds ratio, 95% CI)                                                      | 11/88                      | 0.82                 | 0.29, 2.34  | 11/83                      | 1.33                 | 0.46, 3.84  | 10/80                      | 2.20                 | 0.69, 6.94  |
| <b>S/D ratio</b>                                                                                             |                            |                      |             |                            |                      |             |                            |                      |             |
| Per SD (Beta, 95% CI)                                                                                        |                            | -0.04                | -0.34, 0.25 |                            | 0.02                 | -0.28, 0.32 |                            | 0.19                 | -0.11, 0.49 |
| ≥ vs. <90 <sup>th</sup> percentile (Odds ratio, 95% CI)                                                      | 13/86                      | 1.22                 | 0.44, 3.32  | 11/83                      | 1.45                 | 0.50, 4.20  | 12/78                      | 1.98                 | 0.68, 5.80  |
| <b>Presence of notching</b>                                                                                  |                            |                      |             |                            |                      |             |                            |                      |             |
| Unilateral (Odds ratio, 95% CI)                                                                              | 23/75                      | 1.41                 | 0.75, 2.66  | 16/77                      | 1.03                 | 0.52, 2.04  | 23/67                      | 1.74                 | 0.91, 3.32  |

|                                                         |       |       |             |       |       |             |       |       |             |
|---------------------------------------------------------|-------|-------|-------------|-------|-------|-------------|-------|-------|-------------|
| Bilateral (Odds ratio, 95% CI)                          | 44/54 | 1.21  | 0.64, 2.28  | 25/68 | 1.15  | 0.56, 2.39  | 22/68 | 1.18  | 0.56, 2.48  |
| <b>Among Smokers</b>                                    |       |       |             |       |       |             |       |       |             |
| <b>Pulsatility index</b>                                |       |       |             |       |       |             |       |       |             |
| Per SD (Beta, 95% CI)                                   |       | -0.13 | -0.41, 0.15 |       | -0.07 | -0.35, 0.21 |       | -0.10 | -0.40, 0.19 |
| ≥ vs. <90 <sup>th</sup> percentile (Odds ratio, 95% CI) | 9/92  | 0.34  | 0.10, 1.23  | 17/84 | 0.55  | 0.23, 1.31  | 8/71  | 0.95  | 0.33, 2.71  |
| <b>Resistance index</b>                                 |       |       |             |       |       |             |       |       |             |
| Per SD (Beta, 95% CI)                                   |       | -0.11 | -0.39, 0.18 |       | -0.06 | -0.34, 0.22 |       | -0.08 | -0.38, 0.21 |
| ≥ vs. <90 <sup>th</sup> percentile (Odds ratio, 95% CI) | 9/92  | 0.16  | 0.03, 0.75  | 19/82 | 0.46  | 0.19, 1.07  | 9/70  | 0.91  | 0.33, 2.49  |
| <b>S/D ratio</b>                                        |       |       |             |       |       |             |       |       |             |
| Per SD (Beta, 95% CI)                                   |       | -0.19 | -0.47, 0.10 |       | -0.08 | -0.36, 0.21 |       | -0.11 | -0.41, 0.20 |
| ≥ vs. <90 <sup>th</sup> percentile (Odds ratio, 95% CI) | 10/91 | 0.28  | 0.08, 0.99  | 14/87 | 0.49  | 0.19, 1.25  | 7/72  | 1.04  | 0.35, 3.13  |
| <b>Presence of notching</b>                             |       |       |             |       |       |             |       |       |             |
| Unilateral (Odds ratio, 95% CI)                         | 21/79 | 0.82  | 0.42, 1.59  | 19/82 | 1.34  | 0.71, 2.53  | 14/64 | 0.37  | 0.15, 0.90  |
| Bilateral (Odds ratio, 95% CI)                          | 45/55 | 1.46  | 0.76, 2.80  | 34/67 | 1.07  | 0.55, 2.11  | 17/61 | 4.16  | 1.73, 10.02 |

a. Models adjusted for maternal age, pre-pregnancy BMI, infant sex, parity, marital status, payment for prenatal care, maternal race, maternal education

| <b>Supplementary Table 3. Impact of CALINE NOx<sup>a</sup> on Uterine Resistance by Smoking Status</b> |                            |                      |             |                            |                      |             |                            |                      |             |
|--------------------------------------------------------------------------------------------------------|----------------------------|----------------------|-------------|----------------------------|----------------------|-------------|----------------------------|----------------------|-------------|
| <b>Among Never Smokers</b>                                                                             |                            |                      |             |                            |                      |             |                            |                      |             |
|                                                                                                        |                            | Visit 1              |             |                            | Visit 2              |             |                            | Visit 3              |             |
|                                                                                                        | n: ≥/<br><90 <sup>th</sup> | Model 1 <sup>b</sup> |             | n: ≥/<br><90 <sup>th</sup> | Model 1 <sup>b</sup> |             | n: ≥/<br><90 <sup>th</sup> | Model 1 <sup>b</sup> |             |
| <b>Pulsatility index</b>                                                                               |                            |                      |             |                            |                      |             |                            |                      |             |
| Per SD (Beta, 95% CI)                                                                                  |                            | 0.02                 | -0.10, 0.14 |                            | -0.00                | -0.11, 0.11 |                            | 0.13                 | 0.00, 0.25  |
| ≥ vs. <90 <sup>th</sup> percentile (Odds ratio, 95% CI)                                                | 35/323                     | 1.11                 | 0.71, 1.74  | 25/318                     | 0.90                 | 0.57, 1.43  | 30/286                     | 1.12                 | 0.69, 1.82  |
| <b>Resistance index</b>                                                                                |                            |                      |             |                            |                      |             |                            |                      |             |
| Per SD (Beta, 95% CI)                                                                                  |                            | 0.02                 | -0.10, 0.14 |                            | 0.01                 | -0.11, 0.12 |                            | 0.14                 | 0.01, 0.27  |
| ≥ vs. <90 <sup>th</sup> percentile (Odds ratio, 95% CI)                                                | 36/322                     | 1.11                 | 0.71, 1.74  | 24/319                     | 0.86                 | 0.54, 1.38  | 28/287                     | 1.15                 | 0.70, 1.88  |
| <b>S/D ratio</b>                                                                                       |                            |                      |             |                            |                      |             |                            |                      |             |
| Per SD (Beta, 95% CI)                                                                                  |                            | -0.05                | -0.17, 0.07 |                            | -0.03                | -0.14, 0.08 |                            | 0.11                 | -0.02, 0.24 |
| ≥ vs. <90 <sup>th</sup> percentile (Odds ratio, 95% CI)                                                | 32/326                     | 1.22                 | 0.77, 1.92  | 29/314                     | 1.06                 | 0.69, 1.65  | 28/287                     | 1.36                 | 0.84, 2.23  |
| <b>Presence of notching</b>                                                                            |                            |                      |             |                            |                      |             |                            |                      |             |
| Unilateral (Odds ratio, 95% CI)                                                                        | 89/266                     | 1.03                 | 0.75, 1.41  | 89/252                     | 1.01                 | 0.75, 1.35  | 80/236                     | 1.22                 | 0.88, 1.71  |
| Bilateral (Odds ratio, 95% CI)                                                                         | 141/214                    | 0.92                 | 0.67, 1.26  | 69/272                     | 1.01                 | 0.71, 1.42  | 77/239                     | 0.88                 | 0.62, 1.26  |
| <b>Among Former Smokers</b>                                                                            |                            |                      |             |                            |                      |             |                            |                      |             |
| <b>Pulsatility index</b>                                                                               |                            |                      |             |                            |                      |             |                            |                      |             |
| Per SD (Beta, 95% CI)                                                                                  |                            | -0.01                | -0.28, 0.27 |                            | 0.07                 | -0.18, 0.33 |                            | 0.13                 | -0.13, 0.39 |
| ≥ vs. <90 <sup>th</sup> percentile (Odds ratio, 95% CI)                                                | 12/87                      | 1.05                 | 0.32, 3.47  | 11/83                      | 1.43                 | 0.46, 4.39  | 11/79                      | 1.01                 | 0.34, 3.01  |
| <b>Resistance index</b>                                                                                |                            |                      |             |                            |                      |             |                            |                      |             |
| Per SD (Beta, 95% CI)                                                                                  |                            | 0.01                 | -0.27, 0.28 |                            | 0.06                 | -0.20, 0.32 |                            | 0.13                 | -0.13, 0.39 |
| ≥ vs. <90 <sup>th</sup> percentile (Odds ratio, 95% CI)                                                | 11/88                      | 1.25                 | 0.36, 4.28  | 11/83                      | 1.45                 | 0.48, 4.40  | 10/80                      | 1.05                 | 0.34, 3.28  |
| <b>S/D ratio</b>                                                                                       |                            |                      |             |                            |                      |             |                            |                      |             |
| Per SD (Beta, 95% CI)                                                                                  |                            | -0.03                | -0.32, 0.26 |                            | 0.06                 | -0.21, 0.33 |                            | 0.11                 | -0.16, 0.38 |
| ≥ vs. <90 <sup>th</sup> percentile (Odds ratio, 95% CI)                                                | 13/86                      | 1.12                 | 0.35, 3.57  | 11/83                      | 1.27                 | 0.40, 4.03  | 12/78                      | 0.96                 | 0.33, 2.77  |
| <b>Presence of notching</b>                                                                            |                            |                      |             |                            |                      |             |                            |                      |             |
| Unilateral (Odds ratio, 95% CI)                                                                        | 23/75                      | 1.22                 | 0.60, 2.49  | 16/77                      | 0.71                 | 0.36, 1.41  | 23/67                      | 1.60                 | 0.81, 3.14  |

|                                                         |       |      |             |       |       |             |       |      |             |
|---------------------------------------------------------|-------|------|-------------|-------|-------|-------------|-------|------|-------------|
| Bilateral (Odds ratio, 95% CI)                          | 44/54 | 1.01 | 0.51, 2.00  | 25/68 | 0.86  | 0.42, 1.77  | 22/68 | 0.98 | 0.46, 2.05  |
| <b>Among Smokers</b>                                    |       |      |             |       |       |             |       |      |             |
| <b>Pulsatility index</b>                                |       |      |             |       |       |             |       |      |             |
| Per SD (Beta, 95% CI)                                   |       | 0.14 | -0.12, 0.40 |       | 0.00  | -0.24, 0.25 |       | 0.15 | -0.12, 0.42 |
| ≥ vs. <90 <sup>th</sup> percentile (Odds ratio, 95% CI) | 9/92  | 1.10 | 0.35, 3.38  | 17/84 | 0.87  | 0.37, 2.00  | 8/71  | 1.95 | 0.63, 6.07  |
| <b>Resistance index</b>                                 |       |      |             |       |       |             |       |      |             |
| Per SD (Beta, 95% CI)                                   |       | 0.17 | -0.09, 0.42 |       | -0.00 | -0.25, 0.25 |       | 0.15 | -0.12, 0.43 |
| ≥ vs. <90 <sup>th</sup> percentile (Odds ratio, 95% CI) | 9/92  | 0.82 | 0.27, 2.46  | 19/82 | 0.72  | 0.32, 1.59  | 9/70  | 1.43 | 0.50, 4.13  |
| <b>S/D ratio</b>                                        |       |      |             |       |       |             |       |      |             |
| Per SD (Beta, 95% CI)                                   |       | 0.08 | -0.19, 0.35 |       | 0.06  | -0.20, 0.31 |       | 0.30 | 0.01, 0.59  |
| ≥ vs. <90 <sup>th</sup> percentile (Odds ratio, 95% CI) | 10/91 | 0.89 | 0.29, 2.72  | 14/87 | 0.81  | 0.33, 1.95  | 7/72  | 2.66 | 0.80, 8.82  |
| <b>Presence of notching</b>                             |       |      |             |       |       |             |       |      |             |
| Unilateral (Odds ratio, 95% CI)                         | 21/79 | 1.13 | 0.57, 2.25  | 19/82 | 1.52  | 0.79, 2.91  | 14/64 | 0.76 | 0.36, 1.60  |
| Bilateral (Odds ratio, 95% CI)                          | 45/55 | 1.10 | 0.55, 2.18  | 34/67 | 0.87  | 0.44, 1.74  | 17/61 | 3.12 | 1.29, 7.59  |

a. IQR for natural log-scaled values

b. Models adjusted for maternal age, pre-pregnancy BMI, infant sex, parity, marital status, payment for prenatal care, maternal race, and maternal education

| <b>Supplementary Table 4. Impact of LUR NO<sub>2</sub> (per IQR) on uterine resistance by race</b> |        |                |                      |                |                      |                |                      |        |            |             |
|----------------------------------------------------------------------------------------------------|--------|----------------|----------------------|----------------|----------------------|----------------|----------------------|--------|------------|-------------|
|                                                                                                    |        | Visit 1        |                      | Visit 2        |                      | Visit 3        |                      |        |            |             |
|                                                                                                    |        | n: ≥/<br><90th | Model 1 <sup>a</sup> | n: ≥/<br><90th | Model 1 <sup>a</sup> | n: ≥/<br><90th | Model 1 <sup>a</sup> |        |            |             |
| <b>Among Whites (n=124)</b>                                                                        |        |                |                      |                |                      |                |                      |        |            |             |
| <b>Pulsatility index</b>                                                                           |        |                |                      |                |                      |                |                      |        |            |             |
| Per SD (Beta, 95% CI)                                                                              |        |                | -0.02                | -0.23, 0.19    |                      | 0.14           | -0.07, 0.35          |        | 0.03       | -0.19, 0.26 |
| ≥ vs. <90 <sup>th</sup> percentile (Odds ratio, 95% CI)                                            | 10/112 | 0.94           | 0.36, 2.44           | 6/114          | 1.62                 | 0.53, 5.00     | 7/100                | 1.71   | 0.57, 5.10 |             |
| <b>Resistance index</b>                                                                            |        |                |                      |                |                      |                |                      |        |            |             |
| Per SD (Beta, 95% CI)                                                                              |        |                | -0.01                | -0.22, 0.21    |                      | 0.13           | -0.09, 0.34          |        | 0.04       | -0.19, 0.27 |
| ≥ vs. <90 <sup>th</sup> percentile (Odds ratio, 95% CI)                                            | 11/111 | 0.96           | 0.38, 2.39           | 6/114          | 1.59                 | 0.52, 4.93     | 7/100                | 1.67   | 0.57, 4.90 |             |
| <b>S/D ratio</b>                                                                                   |        |                |                      |                |                      |                |                      |        |            |             |
| Per SD (Beta, 95% CI)                                                                              |        |                | -0.09                | -0.29, 0.12    |                      | 0.15           | -0.05, 0.36          |        | 0.04       | -0.18, 0.25 |
| ≥ vs. <90 <sup>th</sup> percentile (Odds ratio, 95% CI)                                            | 11/111 | 0.97           | 0.39, 2.41           | 6/114          | 1.72                 | 0.60, 4.94     | 10/97                | 1.66   | 0.66, 4.20 |             |
| <b>Presence of notching</b>                                                                        |        |                |                      |                |                      |                |                      |        |            |             |
| Unilateral (Odds ratio, 95% CI)                                                                    |        | 24/97          | 1.01                 | 0.57, 1.78     | 24/96                | 0.84           | 0.47, 1.52           | 30/77  | 0.80       | 0.45, 1.42  |
| Bilateral (Odds ratio, 95% CI)                                                                     |        | 62/59          | 1.13                 | 0.64, 1.98     | 35/85                | 1.55           | 0.86, 2.79           | 28/79  | 1.57       | 0.81, 3.04  |
| <b>Among African Americans (n=238)</b>                                                             |        |                |                      |                |                      |                |                      |        |            |             |
| <b>Pulsatility index</b>                                                                           |        |                |                      |                |                      |                |                      |        |            |             |
| Per SD (Beta, 95% CI)                                                                              |        |                | 0.06                 | -0.14, 0.25    |                      | -0.00          | -0.20, 0.19          |        | 0.01       | -0.21, 0.23 |
| ≥ vs. <90 <sup>th</sup> percentile (Odds ratio, 95% CI)                                            | 21/215 | 1.34           | 0.67, 2.69           | 29/196         | 1.12                 | 0.60, 2.10     | 17/178               | 0.73   | 0.31, 1.71 |             |
| <b>Resistance index</b>                                                                            |        |                |                      |                |                      |                |                      |        |            |             |
| Per SD (Beta, 95% CI)                                                                              |        |                | 0.05                 | -0.15, 0.25    |                      | 0.02           | -0.19, 0.22          |        | 0.00       | -0.22, 0.22 |
| ≥ vs. <90 <sup>th</sup> percentile (Odds ratio, 95% CI)                                            | 21/215 | 1.23           | 0.62, 2.43           | 32/193         | 1.01                 | 0.56, 1.86     | 18/177               | 0.79   | 0.34, 1.83 |             |
| <b>S/D ratio</b>                                                                                   |        |                |                      |                |                      |                |                      |        |            |             |
| Per SD (Beta, 95% CI)                                                                              |        |                | 0.03                 | -0.17, 0.23    |                      | -0.05          | -0.25, 0.15          |        | 0.02       | -0.20, 0.24 |
| ≥ vs. <90 <sup>th</sup> percentile (Odds ratio, 95% CI)                                            | 21/215 | 1.55           | 0.76, 3.15           | 28/197         | 1.04                 | 0.56, 1.93     | 14/181               | 0.94   | 0.38, 2.36 |             |
| <b>Presence of notching</b>                                                                        |        |                |                      |                |                      |                |                      |        |            |             |
| Unilateral (Odds ratio, 95% CI)                                                                    |        | 63/170         | 0.88                 | 0.56, 1.38     | 54/170               | 1.28           | 0.81, 2.00           | 41/154 | 1.73       | 0.98, 3.06  |
| Bilateral (Odds ratio, 95% CI)                                                                     |        | 76/157         | 1.19                 | 0.74, 1.92     | 52/172               | 1.12           | 0.66, 1.90           | 42/153 | 0.77       | 0.42, 1.43  |
| <b>Among Hispanics (n=173)</b>                                                                     |        |                |                      |                |                      |                |                      |        |            |             |

|                             |                                 |        |       |             |        |      |             |        |      |             |
|-----------------------------|---------------------------------|--------|-------|-------------|--------|------|-------------|--------|------|-------------|
| <b>Pulsatility index</b>    |                                 |        |       |             |        |      |             |        |      |             |
|                             | Per SD (Beta, 95% CI)           |        | 0.01  | -0.18, 0.19 |        | 0.07 | -0.11, 0.26 |        | 0.19 | -0.01, 0.38 |
| ≥ vs. <90 <sup>th</sup>     | percentile (Odds ratio, 95% CI) | 22/148 | 0.82  | 0.42, 1.59  | 15/149 | 0.99 | 0.46, 2.12  | 23/134 | 2.04 | 1.03, 4.04  |
| <b>Resistance index</b>     |                                 |        |       |             |        |      |             |        |      |             |
|                             | Per SD (Beta, 95% CI)           |        | 0.02  | -0.17, 0.20 |        | 0.07 | -0.12, 0.26 |        | 0.20 | 0.01, 0.39  |
| ≥ vs. <90 <sup>th</sup>     | percentile (Odds ratio, 95% CI) | 22/148 | 0.86  | 0.45, 1.66  | 13/151 | 0.82 | 0.37, 1.83  | 22/135 | 2.00 | 1.00, 3.97  |
| <b>S/D ratio</b>            |                                 |        |       |             |        |      |             |        |      |             |
|                             | Per SD (Beta, 95% CI)           |        | -0.04 | -0.22, 0.14 |        | 0.08 | -0.10, 0.26 |        | 0.17 | -0.01, 0.36 |
| ≥ vs. <90 <sup>th</sup>     | percentile (Odds ratio, 95% CI) | 19/151 | 0.80  | 0.40, 1.61  | 17/147 | 0.94 | 0.46, 1.93  | 21/136 | 2.32 | 1.14, 4.72  |
| <b>Presence of notching</b> |                                 |        |       |             |        |      |             |        |      |             |
|                             | Unilateral (Odds ratio, 95% CI) | 37/132 | 1.43  | 0.88, 2.32  | 38/124 | 1.23 | 0.78, 1.95  | 37/119 | 0.93 | 0.57, 1.50  |
|                             | Bilateral (Odds ratio, 95% CI)  | 80/89  | 0.89  | 0.57, 1.41  | 35/127 | 0.65 | 0.38, 1.11  | 42/114 | 1.06 | 0.64, 1.76  |

a. Models adjusted for maternal age, pre-pregnancy BMI, infant sex, parity, marital status, payment for prenatal care, maternal smoking, and maternal education

| <b>Supplementary Table 5. Impact of CALINE NOx (per IQR) on uterine resistance by race</b> |                |         |                      |                |         |                      |                |         |                      |
|--------------------------------------------------------------------------------------------|----------------|---------|----------------------|----------------|---------|----------------------|----------------|---------|----------------------|
|                                                                                            |                | Visit 1 |                      |                | Visit 2 |                      |                | Visit 3 |                      |
|                                                                                            | n: ≥/<br><90th |         | Model 1 <sup>a</sup> | n: ≥/<br><90th |         | Model 1 <sup>a</sup> | n: ≥/<br><90th |         | Model 1 <sup>a</sup> |
| <b>Among Whites (n=124)</b>                                                                |                |         |                      |                |         |                      |                |         |                      |
| <b>Pulsatility index</b>                                                                   |                |         |                      |                |         |                      |                |         |                      |
|                                                                                            |                |         |                      |                |         |                      |                |         |                      |
| Per SD (Beta, 95%CI)                                                                       |                | -0.00   | -0.21, 0.20          |                | 0.06    | -0.13, 0.25          |                | 0.09    | -0.10, 0.29          |
| ≥ vs. <90 <sup>th</sup> percentile (Odds ratio, 95% CI)                                    | 10/112         | 1.14    | 0.37, 3.53           | 6/114          | 1.28    | 0.38, 4.31           | 7/100          | 1.56    | 0.48, 5.11           |
| <b>Resistance index</b>                                                                    |                |         |                      |                |         |                      |                |         |                      |
|                                                                                            |                |         |                      |                |         |                      |                |         |                      |
| Per SD (Beta, 95%CI)                                                                       |                | 0.02    | -0.19, 0.23          |                | 0.07    | -0.13, 0.26          |                | 0.10    | -0.11, 0.30          |
| ≥ vs. <90 <sup>th</sup> percentile (Odds ratio, 95% CI)                                    | 11/111         | 1.06    | 0.36, 3.15           | 6/114          | 1.36    | 0.40, 4.56           | 7/100          | 1.58    | 0.48, 5.20           |
| <b>S/D ratio</b>                                                                           |                |         |                      |                |         |                      |                |         |                      |
|                                                                                            |                |         |                      |                |         |                      |                |         |                      |
| Per SD (Beta, 95%CI)                                                                       |                | -0.09   | -0.29, 0.12          |                | 0.04    | -0.15, 0.23          |                | 0.12    | -0.08, 0.31          |
| ≥ vs. <90 <sup>th</sup> percentile (Odds ratio, 95% CI)                                    | 11/111         | 0.93    | 0.34, 2.59           | 6/114          | 1.47    | 0.45, 4.85           | 10/97          | 1.68    | 0.61, 4.61           |
| <b>Presence of notching</b>                                                                |                |         |                      |                |         |                      |                |         |                      |
|                                                                                            |                |         |                      |                |         |                      |                |         |                      |
| Unilateral (Odds ratio, 95% CI)                                                            | 24/97          | 0.93    | 0.50, 1.74           | 24/96          | 0.78    | 0.45, 1.37           | 30/77          | 1.04    | 0.61, 1.77           |
| Bilateral (Odds ratio, 95% CI)                                                             | 62/59          | 0.98    | 0.55, 1.76           | 35/85          | 1.15    | 0.63, 2.09           | 28/79          | 1.06    | 0.56, 1.99           |
| <b>Among African Americans (n=238)</b>                                                     |                |         |                      |                |         |                      |                |         |                      |
| <b>Pulsatility index</b>                                                                   |                |         |                      |                |         |                      |                |         |                      |
|                                                                                            |                |         |                      |                |         |                      |                |         |                      |
| Per SD (Beta, 95%CI)                                                                       |                | 0.01    | -0.15, 0.17          |                | -0.08   | -0.23, 0.07          |                | 0.03    | -0.13, 0.20          |
| ≥ vs. <90 <sup>th</sup> percentile (Odds ratio, 95% CI)                                    | 21/215         | 1.38    | 0.73, 2.60           | 29/196         | 0.94    | 0.55, 1.59           | 17/178         | 0.82    | 0.42, 1.59           |
| <b>Resistance index</b>                                                                    |                |         |                      |                |         |                      |                |         |                      |
|                                                                                            |                |         |                      |                |         |                      |                |         |                      |
| Per SD (Beta, 95%CI)                                                                       |                | -0.01   | -0.17, 0.16          |                | -0.08   | -0.24, 0.07          |                | 0.02    | -0.15, 0.19          |
| ≥ vs. <90 <sup>th</sup> percentile (Odds ratio, 95% CI)                                    | 21/215         | 1.29    | 0.68, 2.42           | 32/193         | 0.90    | 0.54, 1.48           | 18/177         | 0.78    | 0.41, 1.50           |
| <b>S/D ratio</b>                                                                           |                |         |                      |                |         |                      |                |         |                      |
|                                                                                            |                |         |                      |                |         |                      |                |         |                      |
| Per SD (Beta, 95%CI)                                                                       |                | -0.05   | -0.22, 0.13          |                | -0.06   | -0.22, 0.10          |                | 0.13    | -0.05, 0.31          |
| ≥ vs. <90 <sup>th</sup> percentile (Odds ratio, 95% CI)                                    | 21/215         | 1.64    | 0.84, 3.21           | 28/197         | 1.00    | 0.60, 1.69           | 14/181         | 1.17    | 0.57, 2.41           |
| <b>Presence of notching</b>                                                                |                |         |                      |                |         |                      |                |         |                      |
|                                                                                            |                |         |                      |                |         |                      |                |         |                      |
| Unilateral (Odds ratio, 95% CI)                                                            | 63/170         | 1.22    | 0.81, 1.85           | 54/170         | 1.17    | 0.80, 1.73           | 41/154         | 1.24    | 0.78, 1.95           |
| Bilateral (Odds ratio, 95% CI)                                                             | 76/157         | 0.70    | 0.46, 1.07           | 52/172         | 0.78    | 0.51, 1.19           | 42/153         | 0.68    | 0.42, 1.11           |



| <b>Among Hispanics (n=173)</b> |                                 |        |      |             |        |      |             |        |      |             |
|--------------------------------|---------------------------------|--------|------|-------------|--------|------|-------------|--------|------|-------------|
| <b>Pulsatility index</b>       |                                 |        |      |             |        |      |             |        |      |             |
|                                | Per SD (Beta, 95% CI)           |        | 0.07 | -0.13, 0.26 |        | 0.13 | -0.06, 0.32 |        | 0.20 | -0.01, 0.41 |
| ≥ vs. <90 <sup>th</sup>        | percentile (Odds ratio, 95% CI) | 22/148 | 0.75 | 0.36, 1.58  | 15/149 | 1.23 | 0.54, 2.78  | 23/134 | 1.10 | 0.52, 2.33  |
| <b>Resistance index</b>        |                                 |        |      |             |        |      |             |        |      |             |
|                                | Per SD (Beta, 95% CI)           |        | 0.08 | -0.12, 0.28 |        | 0.13 | -0.06, 0.32 |        | 0.23 | 0.01, 0.45  |
| ≥ vs. <90 <sup>th</sup>        | percentile (Odds ratio, 95% CI) | 22/148 | 0.95 | 0.47, 1.95  | 13/151 | 1.23 | 0.52, 2.91  | 22/135 | 1.20 | 0.56, 2.58  |
| <b>S/D ratio</b>               |                                 |        |      |             |        |      |             |        |      |             |
|                                | Per SD (Beta, 95% CI)           |        | 0.02 | -0.17, 0.21 |        | 0.09 | -0.09, 0.27 |        | 0.11 | -0.09, 0.32 |
| ≥ vs. <90 <sup>th</sup>        | percentile (Odds ratio, 95% CI) | 19/151 | 0.83 | 0.38, 1.78  | 17/147 | 1.28 | 0.59, 2.78  | 21/136 | 1.23 | 0.57, 2.66  |
| <b>Presence of notching</b>    |                                 |        |      |             |        |      |             |        |      |             |
|                                | Unilateral (Odds ratio, 95% CI) | 37/132 | 1.43 | 0.85, 2.40  | 38/124 | 1.38 | 0.84, 2.26  | 37/119 | 1.14 | 0.65, 2.02  |
|                                | Bilateral (Odds ratio, 95% CI)  | 80/89  | 1.02 | 0.63, 1.65  | 35/127 | 0.92 | 0.53, 1.58  | 42/114 | 1.52 | 0.85, 2.75  |

a. IQR for natural log-scaled values

b. Models adjusted for maternal age, pre-pregnancy BMI, infant sex, parity, marital status, payment for prenatal care, maternal smoking, and maternal education
